# Supplementary material
Source: PubMed Central journal article supplement (PMC10982892)
Supplement: NIHMS1974336-supplement-SupplementalInfo.pdf [file NIHMS1974336-supplement-SupplementalInfo.pdf]

## Supporting Information

### Nanoscale $\beta$ -TCP-laden GelMA/PCL composite membrane for guided bone regeneration

Abdel H. Mahmoud<sup>a,\*</sup>, Yuanyuan Han<sup>a,b,\*</sup>, Renan Dal-Fabbro<sup>a,\*</sup>, Arwa Dagherery<sup>a,c</sup>,  
Jinping Xu<sup>a</sup>, Darnell Kaigler<sup>d,j</sup>, Sarit B. Bhaduri<sup>e,f</sup>, Jos Malda<sup>g,h,i</sup>, and Marco C. Bottino<sup>a,j\*</sup>

<sup>a</sup> Department of Cariology, Restorative Sciences, and Endodontics, School of Dentistry, University of Michigan, Ann Arbor, Michigan, United States.

<sup>b</sup> Applied Oral Sciences and Community Dental Care, Faculty of Dentistry, The University of Hong Kong, Hong Kong, China.

<sup>c</sup> Department of Restorative Dental Sciences, School of Dentistry, Jazan University, Jazan, Kingdom of Saudi Arabia.

<sup>d</sup> Department of Periodontics and Oral Medicine, School of Dentistry, University of Michigan, Ann Arbor, MI, USA.

<sup>e</sup> Department of Mechanical, Industrial and Manufacturing Engineering, University of Toledo, Toledo, Ohio, United States.

<sup>f</sup> EEC Division, Directorate of Engineering, The National Science Foundation, Alexandria, Virginia, United States.

<sup>g</sup> Regenerative Medicine Center Utrecht, Utrecht, The Netherlands.

<sup>h</sup> Department of Clinical Sciences, Faculty of Veterinary Medicine, Utrecht University, Utrecht, the Netherlands.

<sup>i</sup> Department of Orthopedics, University Medical Center Utrecht, Utrecht, The Netherlands.

<sup>j</sup> Department of Biomedical Engineering, College of Engineering, University of Michigan, Ann Arbor, Michigan, United States.

\* These authors contributed equally as first authors of this article.

#### **\*Corresponding author:**

**Marco C. Bottino, DDS, MSc, PhD, FADM**

Associate Professor and Director, Regenerative Dentistry

University of Michigan School of Dentistry

Department of Cariology, Restorative Sciences, and Endodontics

1011 N. University (Room 2303), Ann Arbor, MI - 48109, USA

Department of Biomedical Engineering, College of Engineering, University of Michigan

Tel: +1-734.763.2206 Fax: +1-734.936.1597.

E-mail address: [mbottino@umich.edu](mailto:mbottino@umich.edu) (Dr. Marco C. Bottino)

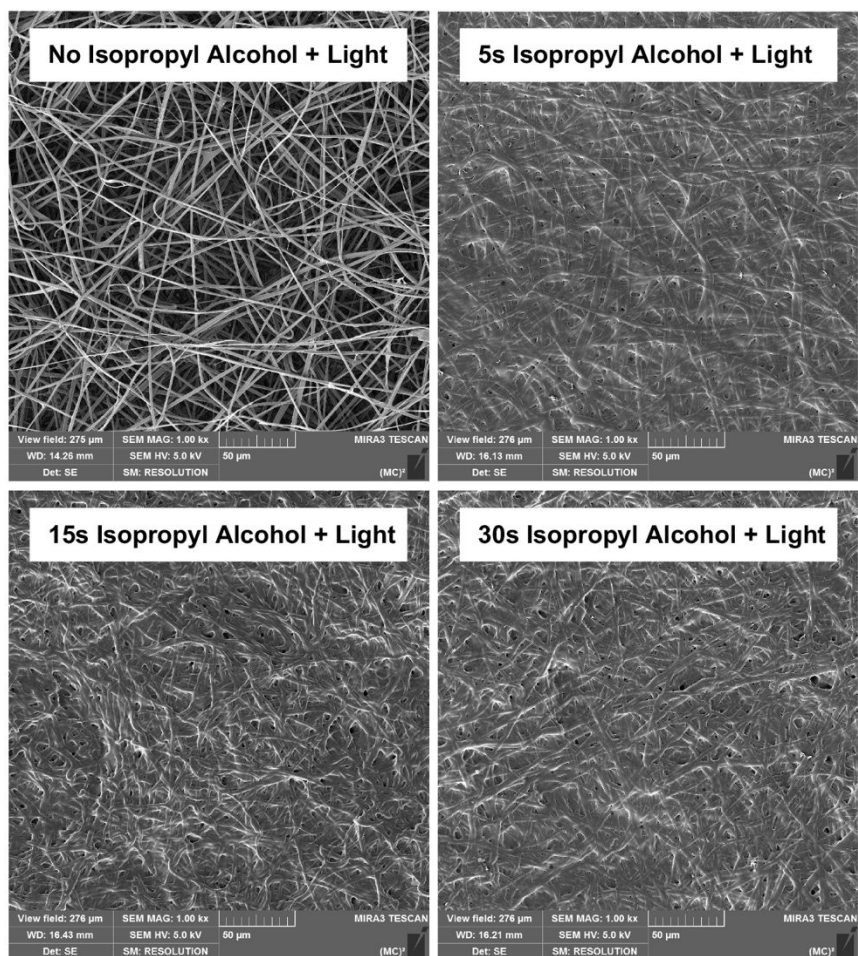

**Figure S1.** Exemplary SEM images of methacrylated gelatin (GelMA, 150 mg/mL) electrospun fibers following the proposed crosslinking protocol (*i.e.*, 85% isopropyl alcohol immersion plus light-emitting diode [LED] light exposure). Generally speaking, the crosslinked fibers, regardless of the incubation time in isopropyl alcohol, led to a significant increase in fiber diameter compared to their uncrosslinked (Light only) counterpart, due to considerable water absorption (fiber swelling) from the alcohol solution.
